# Supplementary material
Source: publisher figshare collection journal article supplement (https://acs.figshare.com/ndownloader/files/4281814)
Supplement: Supplementary file 1 [file 4281814]

## Supporting Information

# Inhibition of 1-Deoxy-*D*-Xylulose-5-Phosphate Reductoisomerase by Lipophilic Phosphonates: SAR, QSAR and Crystallographic Studies

*Lisheng Deng,<sup>†,§</sup> Jiasheng Diao,<sup>†,§</sup> Pinhong Chen,<sup>†</sup> Venugopal Pujari,<sup>¶</sup> Yuan Yao,<sup>†</sup> Gang Cheng,<sup>†</sup> Dean  
Crick,<sup>¶</sup> B. V. Venkataram Prasad,<sup>‡</sup> and Yongcheng Song<sup>\*†</sup>*

<sup>†</sup>Department of Pharmacology and <sup>‡</sup>Verna and Marrs McLean Department of Biochemistry and  
Molecular Biology, Baylor College of Medicine, 1 Baylor Plaza, Houston, TX 77030, and <sup>¶</sup>Department  
of Microbiology, Colorado State University, 1682 Campus Delivery, Ft. Collins, CO 80523

### Table of Contents:

|           |         |
|-----------|---------|
| Figure S1 | Page S2 |
| Figure S2 | Page S3 |
| Figure S3 | Page S4 |
| Figure S4 | Page S5 |
| Figure S5 | Page S6 |

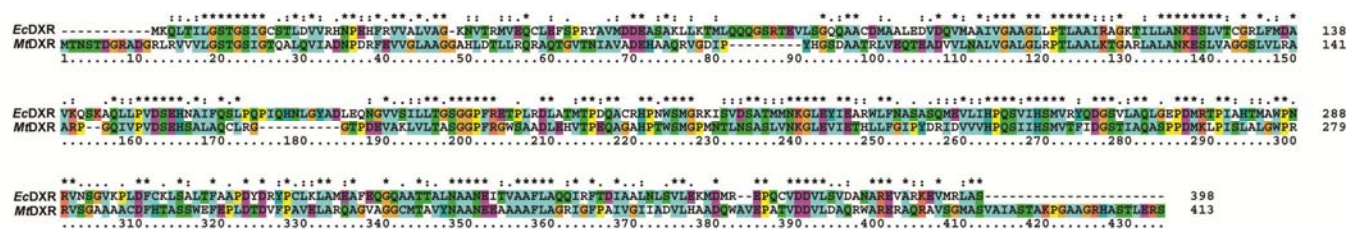

**Figure S1.** Sequence alignment for *EcDXR* and *MtDXR*, showing ~40% identity and 69% similarity.

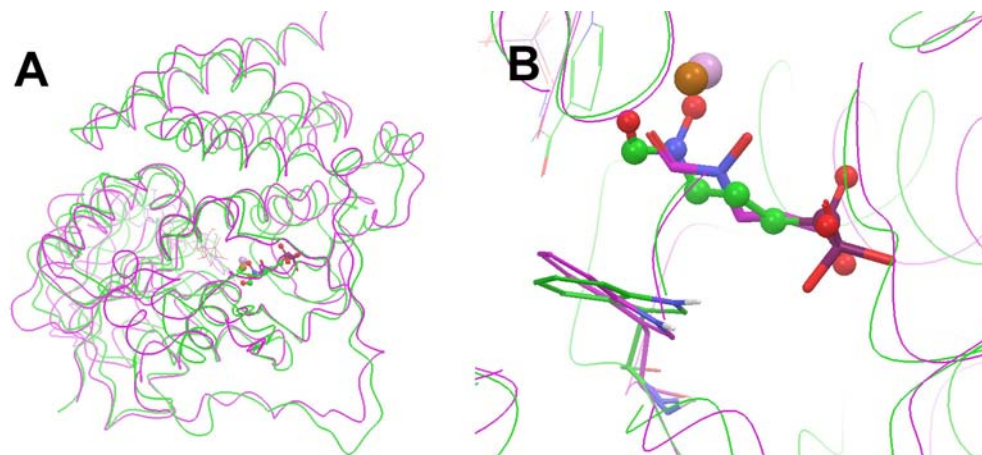

**Figure S2.** (A) Aligned crystal structures of *Ec*DXR:1 (PDB code: 2EGH, in purple) and *Mt*DXR:1 (PDB code: 2JCV, in green); (B) Close-up view of the superimposed active sites.  $Mg^{2+}$  is shown as a pink and  $Mn^{2+}$  as a brown sphere.

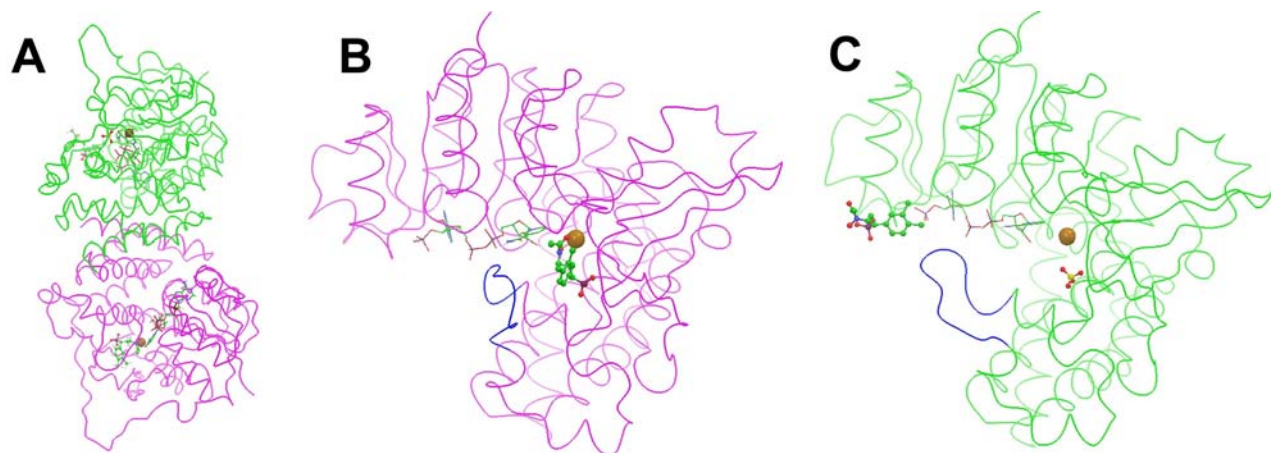

**Figure S3.** (A) The overall structure of the *MtDXR:4* complex as a homodimer; (B) Monomer A containing **4** (ball & stick model), Mn<sup>2+</sup> (brown sphere) and NADPH in the active site, with a “closed” flexible loop (residues 198-208) highlighted as a blue curved line; (C) Monomer B containing SO<sub>4</sub><sup>2-</sup> (ball & stick model), Mn<sup>2+</sup> (brown sphere) and NADPH in the active site, with an “open” flexible loop shown in blue. There is one molecule of **4** non-specifically bound on the surface of monomer B.

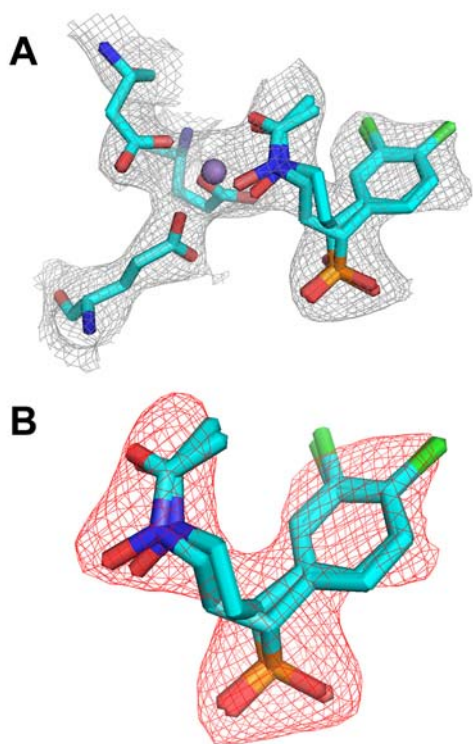

**Figure S4.** (A) The 2F<sub>o</sub>-F<sub>c</sub> electron density map of (*R*)- and (*S*)-**4**, Mn<sup>2+</sup>, and three metal-coordinating residues Asp151, Glu153 and Glu222, contoured at 1σ; (B) The F<sub>o</sub>-F<sub>c</sub> omit map of (*R*)- and (*S*)-**4**, contoured at 3σ.

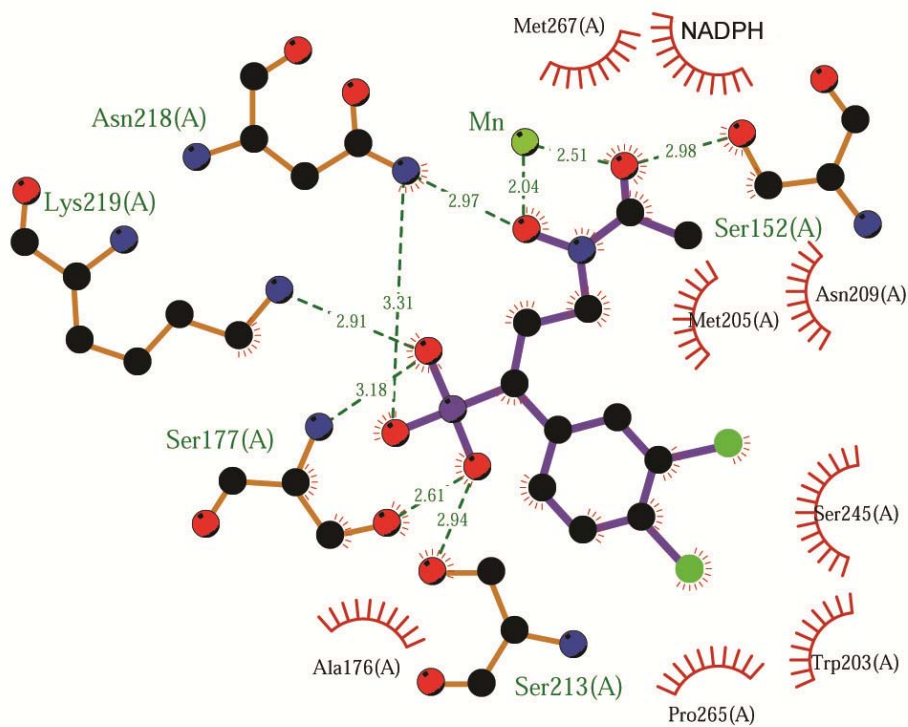

**Figure S5.** Ligplot interaction diagram for (R)-4 in MtDXR.
